# Supplementary figures and images for: Real-time monitoring of functional interactions between upstream and core promoter sequences in living cells of sea urchin embryos
Source: PubMed Central journal article supplement — Nucleic Acids Res. 2007 Jul 10;35(14):4882–94. doi: 10.1093/nar/gkm519 (PMC1950538; doi:10.1093/nar/gkm519), 2007-07-10

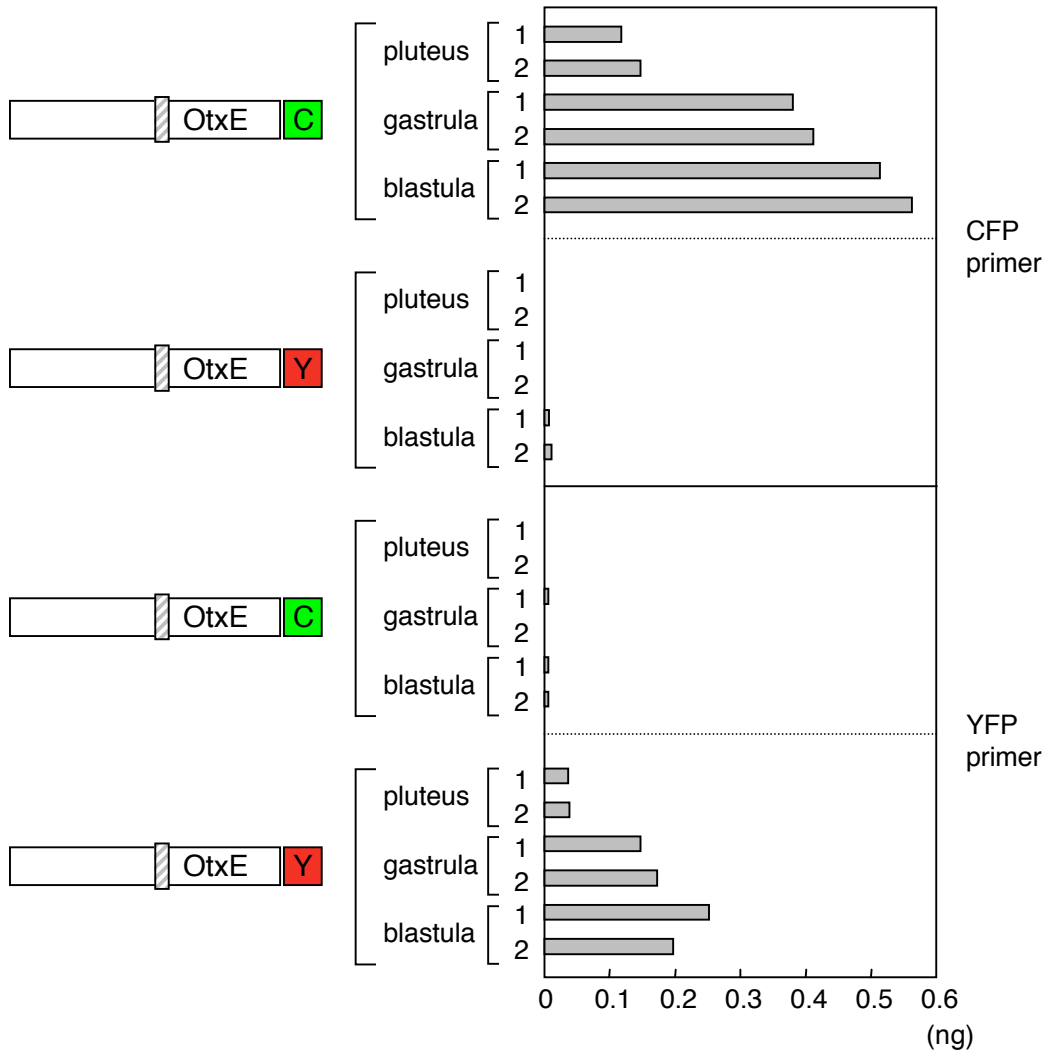

Supplemental Figure 1

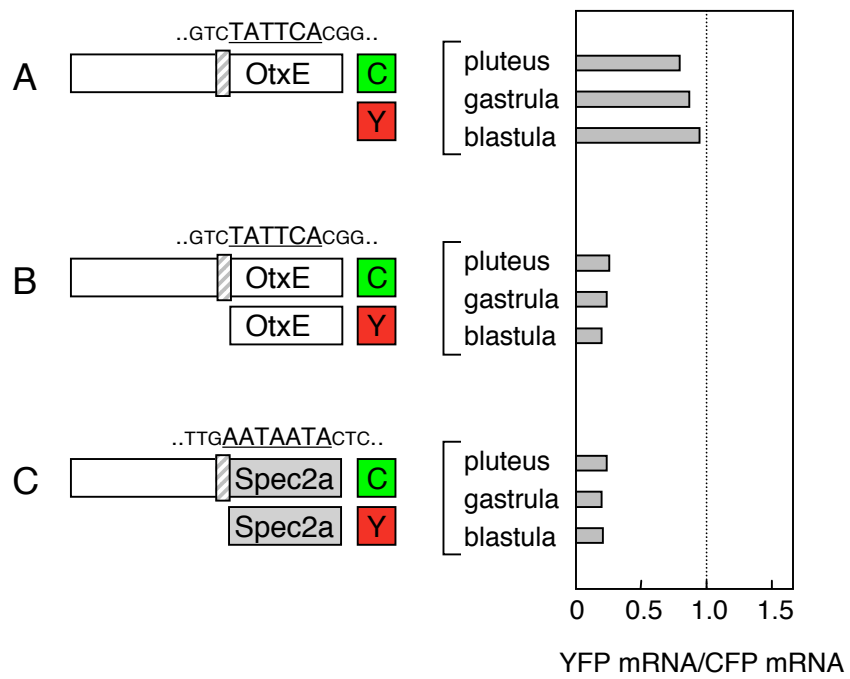

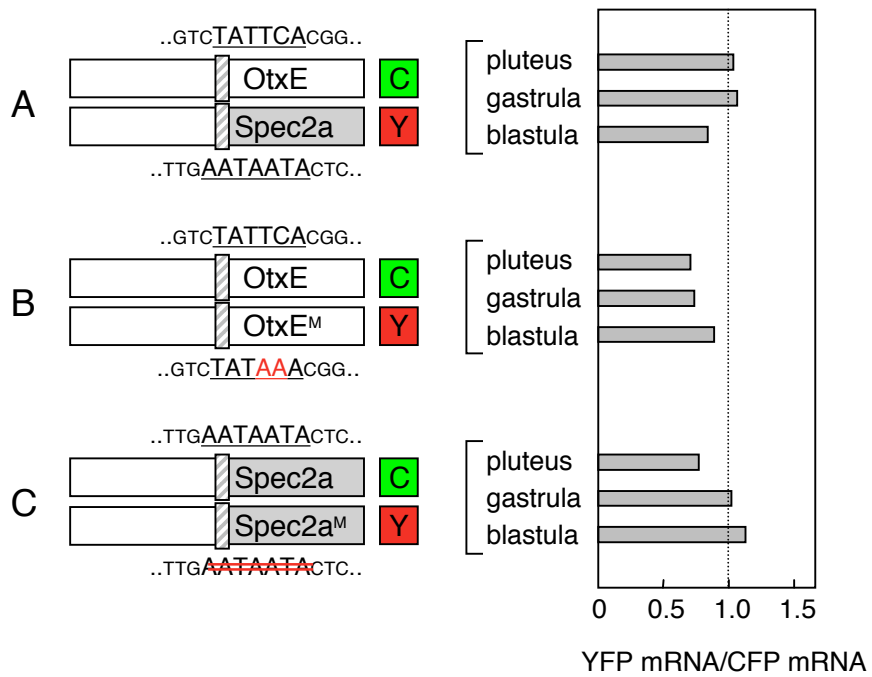

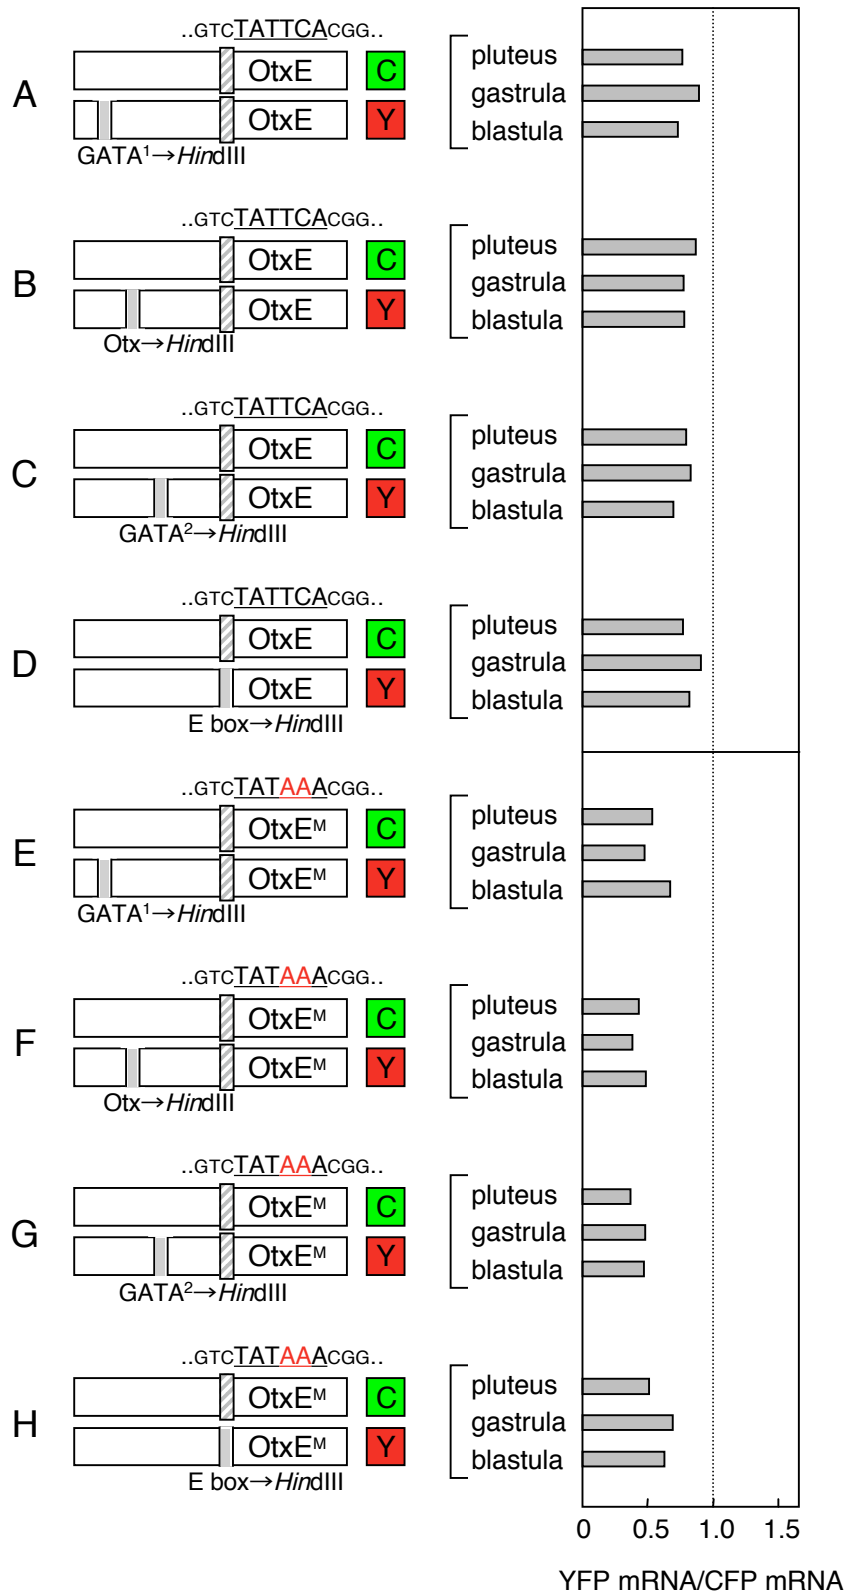

Supplement: nar_gkm519_1.pdf [file nar_gkm519_1.pdf]
